## Addendum

## Addendum: Comparison of *MET* gene amplification analysis by next-generation sequencing and fluorescence *in situ* hybridization

Christina Schmitt<sup>1</sup>, Anna-Alice Schulz<sup>1</sup>, Ria Winkelmann<sup>1</sup>, Kevin Smith<sup>1</sup>, Peter J. Wild<sup>1,2,3</sup> and Melanie Demes<sup>1,2</sup>

<sup>1</sup>Dr. Senckenberg Institute of Pathology, University Hospital Frankfurt, Frankfurt am Main 60590, Germany

<sup>2</sup>Wildlab, University Hospital Frankfurt MVZ GmbH, Frankfurt am Main 60590, Germany

<sup>3</sup>Frankfurt Institute for Advanced Studies (FIAS), Frankfurt am Main 60438, Germany

**Published:**

**Copyright:** © 2023 Schmitt et al. This is an open access article distributed under the terms of the [Creative Commons Attribution License](#) (CC BY 4.0), which permits unrestricted use, distribution, and reproduction in any medium, provided the original author and source are credited.

**This article has an addendum:** No funding was obtained for the publication of this research.

Original article: Oncotarget. 2021; 12:2273–2282. <https://doi.org/10.18632/oncotarget.28092>
